# Supplementary material for: Selective hydrogenation of the CC bond in α,β-unsaturated aldehydes and ketones over ultra-small Pd–Au clusters
Source: Royal Society of Chemistry journal article supplement (doi:10.1039/c6nr07013b), 2016-01-01
Supplement: c6nr07013b1.pdf [file c6nr07013b1.pdf]

## Electronic Supporting Information

### Selective Hydrogenation of C=C bond in $\alpha, \beta$ -Unsaturated Aldehydes and Ketones over Ultra-small Pd-Au Clusters

Yifei Zhang,<sup>a,b,†</sup> Xiujuan Yang,<sup>a,†</sup> Yan Zhou,<sup>a</sup> Gao Li,<sup>a,\*</sup> Zhimin Li,<sup>a</sup> Chao Liu,<sup>a</sup> Ming Bao,<sup>b,\*</sup> Wenjie Shen<sup>a,\*</sup>

<sup>a</sup>State Key Laboratory of Catalysis, Dalian Institute of Chemical Physics, Chinese Academy of Sciences, Dalian 116023, China.

<sup>b</sup>State Key Laboratory of Fine Chemicals, Dalian University of Technology, Dalian 116024, China.

<sup>†</sup>Y.Z. and X.Y. contributed equally to this work.

E-mail addresses: gaoli@dicp.ac.cn (G.L.); mingbao@dlut.edu.cn (M.B.); shen98@dicp.ac.cn (W.S.)

#### Experimental Section

**Materials Synthesis.** The Pd-Au clusters were prepared through a stepwise reduction of gold and palladium salts in THF by sodium borohydride at room temperature. 56 mg H<sub>2</sub>PdCl<sub>4</sub> was dissolved in 15 mL THF at room temperature, and 31  $\mu$ L phenylethanethiol was then added under stirring. 0.225 mmol Au-PA (Au-C $\equiv$ C-Ph) was dropped into the solution and further stirred for 30 min. 5.65 mmol NaBH<sub>4</sub> (dissolved in 3 mL water) was rapidly added and the mixture was kept for 6 h. THF was removed via rotary evaporation; the crude product was thoroughly washed with methanol, and the Pd-Au clusters were extracted with CH<sub>2</sub>Cl<sub>2</sub>. The Pd-Au/CeO<sub>2</sub> catalyst was prepared by an impregnation method. 4 mg Pd-Au clusters was dissolved in 10 mL CH<sub>2</sub>Cl<sub>2</sub>, and 1.0 g CeO<sub>2</sub> was added. After stirring for 12 h at room temperature, the solid was collected by centrifugation and dried at 373 K under vacuum.

**Characterization.** Scanning transmission electron microscopy (STEM) was performed on a JEOL ARM 200F operated at 200 kV. TEM was recorded on a Hitachi 7000 microscope.

Inductively coupled plasma–mass spectrometry was recorded on PerkinElmer ICP-MS NexION 300D, which showed that the metal loading on the catalyst was 0.35 wt.%.

**Catalytic test.** In a typical hydrogenation reaction, substrate (0.1 mL), Pd-Au/CeO<sub>2</sub> (50 mg), and 20 mL solvent were added into an autoclave (50 mL), and the reactor system was pressurized with H<sub>2</sub> to 10 Bar. The reaction was tested at 303 or 323 K for 18 h. After the reaction, the catalyst was separated by centrifugation, and the liquid product was extracted by ethyl acetate and analysed by a gas chromatograph and a mass spectrometer. The conversion of the reactant and selectivity of the products were determined on molar basis.

**Table S1.** Hydrogenation of cinnamaldehyde on the Pd-Au/CeO<sub>2</sub>, Pd/CeO<sub>2</sub> and Au/CeO<sub>2</sub> catalysts.

| Catalyst                                                                                                                               | Conversion (%) | Selectivity (%) |   |    |  |
|----------------------------------------------------------------------------------------------------------------------------------------|----------------|-----------------|---|----|--|
|                                                                                                                                        |                | 1               | 2 | 3  |  |
| Pd-Au/CeO <sub>2</sub>                                                                                                                 | 93             | 85              | 3 | 12 |  |
| Au/CeO <sub>2</sub>                                                                                                                    | 13             | 65              | 0 | 35 |  |
| Pd/CeO <sub>2</sub>                                                                                                                    | 100            | 80              | 0 | 20 |  |
| Reaction conditions: 0.1 mL cinnamaldehyde, 50 mg Pd-Au/CeO <sub>2</sub> catalysts, 20 mL dioxane, H <sub>2</sub> 10 bar, 323 K, 18 h. |                |                 |   |    |  |

Obviously, the alloyed clusters (~1.8 nm) were more selective for the hydrogenation of the C=C bond in the substrate than the monometallic clusters with similar sizes (Pd ~1.9 nm, Au ~2.0 nm).

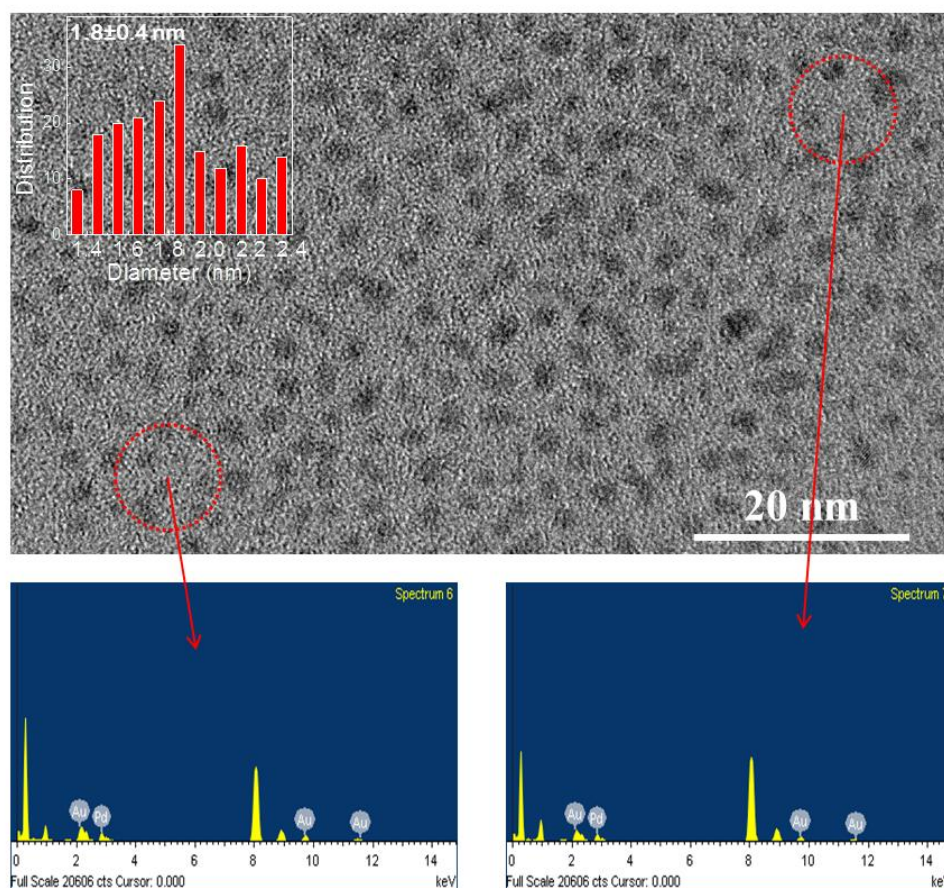

**Figure S1.** TEM image and EDX profiles of the as-prepared Pd-Au clusters. Inset is the size distribution.

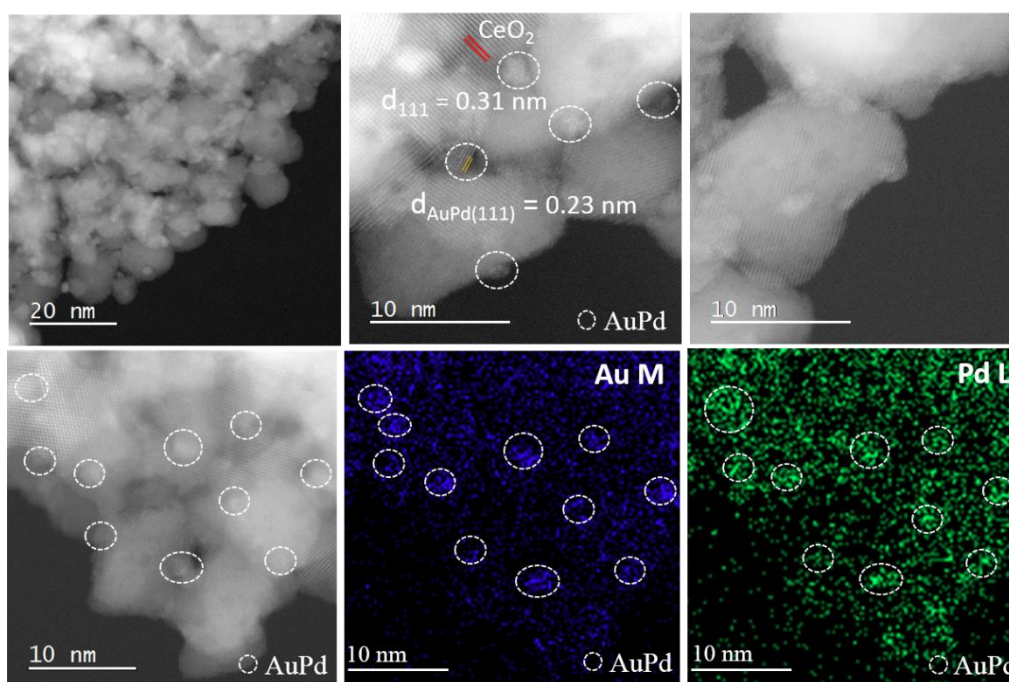

**Figure S2.** STEM images and EDS mapping of the Pd-Au/CeO<sub>2</sub> catalyst. Element mapping indicated that gold and palladium atoms are unfirmly distributed in the clusters, showing an alloy packing pattern.

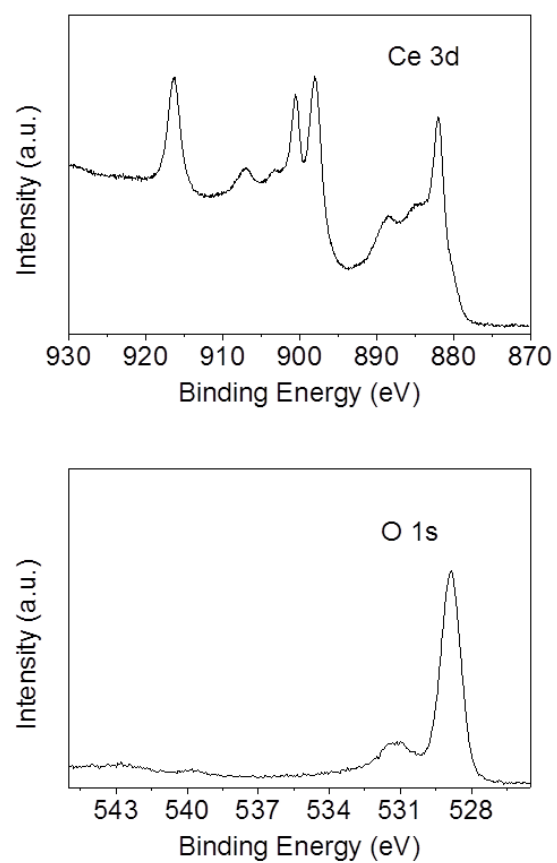

**Figure S3.** XPS spectra of Ce 3d and O 1s in the Pd-Au/CeO<sub>2</sub> catalyst.
